# Supplementary material for: A novel HRM assay for the simultaneous detection and differentiation of eight poxviruses of medical and veterinary importance
Source: PubMed Central journal article supplement (PMC5316968; doi:10.1038/srep42892), 2017-02-20
Supplement: srep42892-s1.pdf [file srep42892-s1.pdf]

**A novel HRM assay for the simultaneous detection and differentiation of eight poxviruses of medical and veterinary importance**

Esayas Gelaye, Lukas Mach, Jolanta Kolodziejek, Reingard Grabherr, Angelika Loitsch, Jenna E. Achenbach, Norbert Nowotny, Adama Diallo and Charles Euloge Lamien

**Supplementary information**

**Supplementary table S1.** Poxvirus samples tested using the HRM assay. The name and origin of each isolate and the host, from which the tissue samples were taken, are indicated, together with the T<sub>m</sub> and the genotype detected by HRM.

| SI No | Strain name     | Country/<br>Origin | Sample type   | Host   | Amplicon<br>T <sub>m</sub> | Genotype | Status |
|-------|-----------------|--------------------|---------------|--------|----------------------------|----------|--------|
| 1     | B624/2010       | Kenya              | Skin scraping | Cattle | 77.40                      | LSDV     | known  |
| 2     | B291/2007       | Kenya              | Nodules       | Cattle | 77.40                      | LSDV     | known  |
| 3     | B3383/2011      | Kenya              | Nodules       | Cattle | 77.20                      | LSDV     | known  |
| 4     | O58/2011        | Kenya              | Skin scraping | Sheep  | 75.80                      | GTPV     | known  |
| 5     | G143/2009       | Kenya              | Skin scraping | Goat   | 75.60                      | GTPV     | known  |
| 6     | O59/2011        | Kenya              | Skin scraping | Sheep  | 75.60                      | GTPV     | known  |
| 7     | MOG/SP/T/1/2006 | Mongolia           | Skin scraping | Sheep  | 76.40                      | SPPV     | known  |
| 8     | MOG/SP/T/2/2006 | Mongolia           | Skin scraping | Sheep  | 76.20                      | SPPV     | known  |
| 9     | MOG/SP/T/3/2007 | Mongolia           | Skin scraping | Sheep  | 76.20                      | SPPV     | known  |
| 10    | MOG/GP/T/4/2008 | Mongolia           | Skin scraping | Goat   | 75.60                      | GTPV     | known  |

|    |                  |            |               |         |       |      |       |
|----|------------------|------------|---------------|---------|-------|------|-------|
| 11 | MOG/GP/T/5/2008  | Mongolia   | Skin scraping | Goat    | 75.60 | GTPV | known |
| 12 | MOG/GP/T/6/2008  | Mongolia   | Skin scraping | Goat    | 75.60 | GTPV | known |
| 13 | Poumon 185M      | Mali       | Skin scraping | Sheep   | 76.20 | SPPV | known |
| 14 | LSDV Massalamia  | Sudan      | Skin scraping | Cattle  | 77.20 | LSDV | known |
| 15 | GTPV Denizli     | Turkey     | Skin scraping | Goat    | 75.80 | GTPV | known |
| 16 | BPSV Stamm M1    | Germany    | Cell culture  | Cattle  | 81.60 | BPSV | known |
| 17 | CE 030ODV        | Germany    | Cell culture  | Sheep   | 80.40 | ORFV | known |
| 18 | ORFV D1701       | Germany    | Cell culture  | Sheep   | 80.40 | ORFV | known |
| 19 | GTPV Ghana       | Ghana      | Cell culture  | Goat    | 75.60 | GTPV | known |
| 20 | GTPV Bangladesh  | Bangladesh | Cell culture  | Goat    | 75.60 | GTPV | known |
| 21 | KS-1             | Kenya      | Cell culture  | Sheep   | 77.20 | LSDV | known |
| 22 | SPPV/98 Darica   | Turkey     | Cell culture  | Sheep   | 76.20 | SPPV | known |
| 23 | SPPV HSL         | Austria    | Cell culture  | Sheep   | 76.20 | SPPV | known |
| 24 | SPPV Denizli     | Turkey     | Cell culture  | Sheep   | 76.20 | SPPV | known |
| 25 | SPPV Vaccine     | Morocco    | Cell culture  | Vaccine | 76.20 | SPPV | known |
| 26 | GTPV Oman        | Oman       | Cell culture  | Goat    | 75.60 | GTPV | known |
| 27 | SPPV Illizi      | Algeria    | Cell culture  | Sheep   | 76.00 | SPPV | known |
| 28 | GTPV Gorgan      | Iraq       | Cell culture  | Goat    | 75.60 | GTPV | known |
| 29 | SPPV Djelfa      | Algeria    | Cell culture  | Sheep   | 76.20 | SPPV | known |
| 30 | SPPV Sivas       | Turkey     | Cell culture  | Sheep   | 76.00 | SPPV | known |
| 31 | GTPV Sudan       | Sudan      | Cell culture  | Goat    | 76.20 | SPPV | known |
| 32 | SPPV Corum       | Turkey     | Cell culture  | Sheep   | 76.20 | SPPV | known |
| 33 | GTPV Yemen       | Yemen      | Cell culture  | Goat    | 75.80 | GTPV | known |
| 34 | LSDV Sinnar      | Sudan      | Cell culture  | Cattle  | 77.20 | LSDV | known |
| 35 | LSDV North Sudan | Sudan      | Cell culture  | Cattle  | 77.20 | LSDV | known |
| 36 | LSDV Ismalia     | Egypt      | Cell culture  | Cattle  | 77.20 | LSDV | known |
| 37 | OB3              | Germany    | Cell culture  | Sheep   | 80.40 | ORFV | known |
| 38 | LSDV Sundus      | Sudan      | Cell culture  | Cattle  | 77.20 | LSDV | known |
| 39 | SPPV Van         | Turkey     | Cell culture  | Sheep   | 76.20 | SPPV | known |

|    |                     |                 |               |       |             |           |       |
|----|---------------------|-----------------|---------------|-------|-------------|-----------|-------|
| 40 | SPPV Soba           | Sudan           | Cell culture  | Sheep | 76.20       | SPPV      | known |
| 41 | SPPV Oman           | Oman            | Cell culture  | Sheep | 75.60       | GTPV      | known |
| 42 | SPPV Algeria        | Algeria         | Cell culture  | Sheep | 76.20       | SPPV      | known |
| 43 | GTPV Saudi Arabia   | Saudi Arabia    | Cell culture  | Goat  | 76.20       | SPPV      | known |
| 44 | ORFV 01/2014        | Dondwe-Tanzania | Nasal swab    | Goat  | 80.40       | ORFV      | Blind |
| 45 | ORFV 02/2014        | Dondwe-Tanzania | Nasal swab    | Goat  | 80.40       | ORFV      | Blind |
| 46 | Fafan/01/2012       | Ethiopia        | Skin scraping | Camel | 73.00       | CMLV      | Blind |
| 47 | Fafan/02/2012       | Ethiopia        | Skin scraping | Camel | 73.00       | CMLV      | Blind |
| 48 | Fafan/03/2012       | Ethiopia        | Skin scraping | Camel | 81.40       | PCPV      | Blind |
| 49 | Golajo/01/2012      | Ethiopia        | Skin scraping | Camel | 73.00       | CMLV      | Blind |
| 50 | Golajo/02/2012      | Ethiopia        | Skin scraping | Camel | 72.80/81.40 | CMLV/PCPV | Blind |
| 51 | Golajo/03/2012      | Ethiopia        | Skin scraping | Camel | 73.00       | CMLV      | Blind |
| 52 | Hordha/01/2011      | Ethiopia        | Skin scraping | Camel | 72.80/81.40 | CMLV/PCPV | Blind |
| 53 | Hordha/02/2011      | Ethiopia        | Skin scraping | Camel | 73.00       | CMLV      | Blind |
| 54 | Hadow/01/2012       | Ethiopia        | Skin scraping | Camel | 73.00       | CMLV      | Blind |
| 55 | Hadow/02/2012       | Ethiopia        | Skin scraping | Camel | 73.00       | CMLV      | Blind |
| 56 | Chifra H1/2011      | Ethiopia        | Skin scraping | Camel | 81.40       | PCPV      | Blind |
| 57 | Chifra H2/2011      | Ethiopia        | Skin scraping | Camel | 81.40       | PCPV      | Blind |
| 58 | Chifra H3/2011      | Ethiopia        | Skin scraping | Camel | 81.40       | PCPV      | Blind |
| 59 | Chifra H4/2011      | Ethiopia        | Skin scraping | Camel | 81.40       | PCPV      | Blind |
| 60 | Chifra H5/2011      | Ethiopia        | Skin scraping | Camel | 81.40       | PCPV      | Blind |
| 61 | Chifra C-532/2011   | Ethiopia        | Skin scraping | Camel | 81.40       | PCPV      | Blind |
| 62 | Borena VR352/14 C-1 | Ethiopia        | Skin scraping | Camel | 73.00       | CMLV      | Blind |
| 63 | Borena VR352/14 C-2 | Ethiopia        | Skin scraping | Camel | 72.80       | CMLV      | Blind |
| 64 | Borena VR352/14 C-3 | Ethiopia        | Skin scraping | Camel | 73.00       | CMLV      | Blind |
| 65 | Borena VR352/14 C-4 | Ethiopia        | Skin scraping | Camel | 73.00       | CMLV      | Blind |
| 66 | Borena VR352/14 C-5 | Ethiopia        | Skin scraping | Camel | 73.00       | CMLV      | Blind |
| 67 | Borena VR352/14 C-6 | Ethiopia        | Skin scraping | Camel | 72.80       | CMLV      | Blind |
| 68 | Borena VR352/14 C-A | Ethiopia        | Skin scraping | Camel | 73.00       | CMLV      | Blind |

|    |                        |          |               |        |       |      |       |
|----|------------------------|----------|---------------|--------|-------|------|-------|
| 69 | Borena VR352/14 C-B    | Ethiopia | Skin scraping | Camel  | 72.80 | CMLV | Blind |
| 70 | Borena VR352/14 C-C    | Ethiopia | Skin scraping | Camel  | 73.00 | CMLV | Blind |
| 71 | Borena VR352/14 C-D    | Ethiopia | Skin scraping | Camel  | 72.80 | CMLV | Blind |
| 72 | Borena VR352/14 C-BD1  | Ethiopia | Skin scraping | Camel  | 73.00 | CMLV | Blind |
| 73 | Borena VR352/14 C-BD2  | Ethiopia | Skin scraping | Camel  | 72.80 | CMLV | Blind |
| 74 | Borena VR352/14 C-BD3  | Ethiopia | Skin scraping | Camel  | 73.00 | CMLV | Blind |
| 75 | Borena VR352/14 C-BD4  | Ethiopia | Skin scraping | Camel  | 73.00 | CMLV | Blind |
| 76 | Borena C-HDG1 VR389/14 | Ethiopia | Skin scraping | Camel  | 72.80 | CMLV | Blind |
| 77 | Borena C-HDG2 VR389/14 | Ethiopia | Skin scraping | Camel  | 72.80 | CMLV | Blind |
| 78 | Borena C-HMA1 VR389/14 | Ethiopia | Skin scraping | Camel  | 72.80 | CMLV | Blind |
| 79 | Borena C-HMA2 VR389/14 | Ethiopia | Skin scraping | Camel  | 72.80 | CMLV | Blind |
| 80 | Borena C-2 VR387/14    | Ethiopia | Skin scraping | Camel  | 81.20 | PCPV | Blind |
| 81 | CaPV Adama 1           | Ethiopia | Skin scraping | Sheep  | 75.80 | GTPV | known |
| 82 | CaPV Adama 2           | Ethiopia | Skin scraping | Sheep  | 75.40 | GTPV | known |
| 83 | CaPV Adama 3           | Ethiopia | Skin scraping | Sheep  | 75.60 | GTPV | known |
| 84 | CaPV Adama 4           | Ethiopia | Skin scraping | Sheep  | 75.60 | GTPV | known |
| 85 | CaPV D/Berhan 1        | Ethiopia | Skin scraping | Sheep  | 75.60 | GTPV | known |
| 86 | CaPV D/Berhan 2        | Ethiopia | Skin scraping | Sheep  | 75.60 | GTPV | known |
| 87 | CaPV Mojo A            | Ethiopia | Skin scraping | Sheep  | 75.60 | GTPV | known |
| 88 | CaPV Mojo C            | Ethiopia | Skin scraping | Sheep  | 75.80 | GTPV | known |
| 89 | CaPV Fiche 1           | Ethiopia | Skin scraping | Sheep  | 75.80 | GTPV | known |
| 90 | CaPV Fiche 2           | Ethiopia | Skin scraping | Sheep  | 75.80 | GTPV | known |
| 91 | CaPV Assosa 1          | Ethiopia | Skin scraping | Goat   | 75.60 | GTPV | known |
| 92 | CaPV Assosa 2          | Ethiopia | Skin scraping | Goat   | 75.80 | GTPV | known |
| 93 | CaPV Andassa C-3       | Ethiopia | Skin scraping | Cattle | 77.40 | LSDV | known |
| 94 | CaPV Andassa C-4       | Ethiopia | Skin scraping | Cattle | 77.40 | LSDV | known |
| 95 | CaPV Andassa C-5       | Ethiopia | Skin scraping | Cattle | 77.40 | LSDV | known |
| 96 | Borena VR386/14 C-1    | Ethiopia | Skin scraping | Camel  | 81.20 | PCPV | Blind |
| 97 | Borena VR386/14 C-2    | Ethiopia | Skin scraping | Camel  | 81.20 | PCPV | Blind |

---

|     |                      |          |                     |        |       |      |       |
|-----|----------------------|----------|---------------------|--------|-------|------|-------|
| 98  | Borena VR386/14 C-3  | Ethiopia | Skin scraping       | Camel  | 81.20 | PCPV | Blind |
| 99  | Borena VR386/14 C-4  | Ethiopia | Skin scraping       | Camel  | 81.20 | PCPV | Blind |
| 100 | Borena VR386/14 C-5  | Ethiopia | Skin scraping       | Camel  | 81.20 | PCPV | Blind |
| 101 | Borena VR386/14 C-6  | Ethiopia | Skin scraping       | Camel  | 81.20 | PCPV | Blind |
| 102 | Borena VR386/14 C-7  | Ethiopia | Skin scraping       | Camel  | 81.20 | PCPV | Blind |
| 103 | Borena VR386/14 C-8  | Ethiopia | Skin scraping       | Camel  | 81.20 | PCPV | Blind |
| 104 | Borena VR386/14 C-9  | Ethiopia | Skin scraping       | Camel  | 81.20 | PCPV | Blind |
| 105 | Borena VR386/14 C-10 | Ethiopia | Skin scraping       | Camel  | 81.20 | PCPV | Blind |
| 106 | LSD NS H/Abote 04    | Ethiopia | Nasal swab          | Cattle | 77.20 | LSDV | Blind |
| 107 | LSD NS H/Abote 05    | Ethiopia | Nasal swab          | Cattle | 77.20 | LSDV | Blind |
| 108 | LSD NS H/Abote 06    | Ethiopia | Nasal swab          | Cattle | 77.20 | LSDV | Blind |
| 109 | LSD NS H/Abote 07    | Ethiopia | Nasal swab          | Cattle | 77.20 | LSDV | Blind |
| 110 | LSD NS H/Abote 08    | Ethiopia | Nasal swab          | Cattle | 77.20 | LSDV | Blind |
| 111 | LSD NS Kuyu 18       | Ethiopia | Nasal swab          | Cattle | 77.20 | LSDV | Blind |
| 112 | LSD NS Kuyu 19       | Ethiopia | Nasal swab          | Cattle | 77.20 | LSDV | Blind |
| 113 | LSD NS Kuyu 20       | Ethiopia | Nasal swab          | Cattle | 77.20 | LSDV | Blind |
| 114 | LSD NS Kuyu 21       | Ethiopia | Nasal swab          | Cattle | 77.20 | LSDV | Blind |
| 115 | LSD NS Kuyu 22       | Ethiopia | Nasal swab          | Cattle | 77.20 | LSDV | Blind |
| 116 | LSD NS Kuyu 23       | Ethiopia | Nasal swab          | Cattle | 77.20 | LSDV | Blind |
| 117 | LSD NS Kuyu 24       | Ethiopia | Nasal swab          | Cattle | 77.20 | LSDV | Blind |
| 118 | LSD NS Kuyu 25       | Ethiopia | Nasal swab          | Cattle | 77.20 | LSDV | Blind |
| 119 | LSD NS Kuyu 27       | Ethiopia | Nasal swab          | Cattle | 77.20 | LSDV | Blind |
| 120 | LSD LN Kuyu 18       | Ethiopia | Lymph Node Aspirate | Cattle | 77.20 | LSDV | Blind |
| 121 | LSD LN Kuyu 19       | Ethiopia | Lymph Node Aspirate | Cattle | 77.20 | LSDV | Blind |
| 122 | LSD LN Kuyu 23       | Ethiopia | Lymph Node Aspirate | Cattle | 77.20 | LSDV | Blind |
| 123 | LSD NS W/Jarso 09    | Ethiopia | Nasal swab          | Cattle | 77.20 | LSDV | Blind |
| 124 | LSD NS W/Jarso 11    | Ethiopia | Nasal swab          | Cattle | 77.20 | LSDV | Blind |
| 125 | LSD NS W/Jarso 33    | Ethiopia | Nasal swab          | Cattle | 77.20 | LSDV | Blind |
| 126 | LSD NS W/Jarso 34    | Ethiopia | Nasal swab          | Cattle | 77.20 | LSDV | Blind |

---

---

|     |                         |          |                     |        |       |      |       |
|-----|-------------------------|----------|---------------------|--------|-------|------|-------|
| 127 | LSD NS W/Jarso 39       | Ethiopia | Nasal swab          | Cattle | 77.20 | LSDV | Blind |
| 128 | LSD NS W/Jarso 40       | Ethiopia | Nasal swab          | Cattle | 77.20 | LSDV | Blind |
| 129 | ORFV MB38/13 C-1        | Ethiopia | Skin scraping       | Sheep  | 80.40 | ORFV | known |
| 130 | ORFV MB38/13 C-2        | Ethiopia | Skin scraping       | Sheep  | 80.40 | ORFV | known |
| 131 | ORFV MB38/13 C-3        | Ethiopia | Skin scraping       | Sheep  | 80.40 | ORFV | known |
| 132 | ORFV MB38/13 C-4        | Ethiopia | Skin scraping       | Sheep  | 80.40 | ORFV | known |
| 133 | ORFV MB38/13 C-5        | Ethiopia | Skin scraping       | Goat   | 80.40 | ORFV | known |
| 134 | ORFV MB38/13 C-6        | Ethiopia | Skin scraping       | Goat   | 80.40 | ORFV | known |
| 135 | ORFV MB38/13 C-7        | Ethiopia | Skin scraping       | Goat   | 80.40 | ORFV | known |
| 136 | ORFV MB38/13 C-8        | Ethiopia | Skin scraping       | Goat   | 80.40 | ORFV | known |
| 137 | ORFV Adet C-1           | Ethiopia | Skin scraping       | Sheep  | 80.60 | ORFV | known |
| 138 | ORFV Adet C-2           | Ethiopia | Skin scraping       | Sheep  | 80.60 | ORFV | known |
| 139 | ORFV DZ C-1             | Ethiopia | Skin scraping       | Sheep  | 80.40 | ORFV | known |
| 140 | ORFV DZ C-2             | Ethiopia | Skin scraping       | Sheep  | 80.40 | ORFV | known |
| 141 | ORFV ATARC 2008 C-1     | Ethiopia | Skin scraping       | Sheep  | 80.40 | ORFV | known |
| 142 | ORFV ATARC 2008 C-2     | Ethiopia | Skin scraping       | Sheep  | 80.40 | ORFV | known |
| 143 | ORFV ATARC 2010 C-1     | Ethiopia | Skin scraping       | Sheep  | 80.40 | ORFV | known |
| 144 | ORFV ATARC 2010 C-2     | Ethiopia | Skin scraping       | Sheep  | 80.40 | ORFV | known |
| 145 | CaPV Ambo N swab C-3    | Ethiopia | Nasal swab          | Cattle | 77.20 | LSDV | Blind |
| 146 | CaPV Ambo N swab C-4    | Ethiopia | Nasal swab          | Cattle | 77.20 | LSDV | Blind |
| 147 | CaPV Ambo N swab C-5    | Ethiopia | Nasal swab          | Cattle | 77.20 | LSDV | Blind |
| 148 | CaPV Ambo T susp C-2    | Ethiopia | Skin scraping       | Cattle | 77.20 | LSDV | Blind |
| 149 | CaPV Ambo T susp C-7758 | Ethiopia | Skin scraping       | Cattle | 77.20 | LSDV | Blind |
| 150 | CaPV Ambo T susp C-7815 | Ethiopia | Skin scraping       | Cattle | 77.20 | LSDV | Blind |
| 151 | CaPV Ambo LN B-506      | Ethiopia | Lymph Node Aspirate | Cattle | 77.20 | LSDV | Blind |
| 152 | CaPV Ambo LN 061        | Ethiopia | Lymph Node Aspirate | Cattle | 77.00 | LSDV | Blind |
| 153 | CaPV Ambo LN 057        | Ethiopia | Lymph Node Aspirate | Cattle | 77.00 | LSDV | Blind |
| 154 | CaPV Ambo LN B-406      | Ethiopia | Lymph Node Aspirate | Cattle | 77.00 | LSDV | Blind |
| 155 | CaPV Tigray C-1         | Ethiopia | Skin scraping       | Goat   | 75.60 | GTPV | Blind |

---

|     |                    |          |                     |         |       |      |       |
|-----|--------------------|----------|---------------------|---------|-------|------|-------|
| 156 | CaPV Tigray C-2    | Ethiopia | Skin scraping       | Goat    | 75.60 | GTPV | Blind |
| 157 | CaPV Asella WJ 12  | Ethiopia | Nasal swab          | Cattle  | 77.00 | LSDV | Blind |
| 158 | CaPV Asella WJ 13  | Ethiopia | Nasal swab          | Cattle  | 77.00 | LSDV | Blind |
| 159 | CaPV Asella WJ 14  | Ethiopia | Nasal swab          | Cattle  | 77.00 | LSDV | Blind |
| 160 | CaPV Asella WJ 15  | Ethiopia | Nasal swab          | Cattle  | 77.00 | LSDV | Blind |
| 161 | CaPV Asella WJ 16  | Ethiopia | Nasal swab          | Cattle  | 77.00 | LSDV | Blind |
| 162 | CaPV Asella WJ 11  | Ethiopia | Lymph Node Aspirate | Cattle  | 77.00 | LSDV | Blind |
| 163 | CaPV Asella WJ 13  | Ethiopia | Lymph Node Aspirate | Cattle  | 77.00 | LSDV | Blind |
| 164 | CaPV Asella WJ 14  | Ethiopia | Lymph Node Aspirate | Cattle  | 77.00 | LSDV | Blind |
| 165 | CaPV Asella WJ 15  | Ethiopia | Lymph Node Aspirate | Cattle  | 77.20 | LSDV | Blind |
| 166 | CaPV Asella WJ 16  | Ethiopia | Lymph Node Aspirate | Cattle  | 77.00 | LSDV | Blind |
| 167 | CaPV B/Dar Lab C-1 | Ethiopia | Nasal swab          | Cattle  | 77.00 | LSDV | Blind |
| 168 | CaPV B/Dar Lab C-3 | Ethiopia | Nasal swab          | Cattle  | 77.20 | LSDV | Blind |
| 169 | CaPV B/Dar Lab C-6 | Ethiopia | Ocular swab         | Cattle  | 77.00 | LSDV | Blind |
| 170 | CaPV B/Dar Lab C-1 | Ethiopia | Lymph Node Aspirate | Cattle  | 77.00 | LSDV | Blind |
| 171 | CaPV B/Dar Lab C-3 | Ethiopia | Lymph Node Aspirate | Cattle  | 77.00 | LSDV | Blind |
| 172 | CaPV Tigray C-034  | Ethiopia | Skin scraping       | Cattle  | 77.00 | LSDV | Blind |
| 173 | CaPV Tigray C-035  | Ethiopia | Skin scraping       | Cattle  | 77.00 | LSDV | Blind |
| 174 | CaPV Ambo 501      | Ethiopia | Nasal swab          | Cattle  | 77.20 | LSDV | Blind |
| 175 | CaPV Ambo B-047    | Ethiopia | Nasal swab          | Cattle  | 77.00 | LSDV | Blind |
| 176 | CaPV Ambo B-405    | Ethiopia | Nasal swab          | Cattle  | 77.00 | LSDV | Blind |
| 177 | CaPV Ambo B-508    | Ethiopia | Nasal swab          | Cattle  | 77.00 | LSDV | Blind |
| 178 | CaPV Ambo B-406    | Ethiopia | Nasal swab          | Cattle  | 77.20 | LSDV | Blind |
| 179 | CaPV Ambo C-6      | Ethiopia | Nasal swab          | Cattle  | 77.00 | LSDV | Blind |
| 180 | CaPV Ambo B-06     | Ethiopia | Nasal swab          | Cattle  | 77.00 | LSDV | Blind |
| 181 | CaPV Ambo B-40     | Ethiopia | Nasal swab          | Cattle  | 77.00 | LSDV | Blind |
| 182 | CaPV Ambo B-407    | Ethiopia | Nasal swab          | Cattle  | 77.00 | LSDV | Blind |
| 183 | CaPV Akaki         | Ethiopia | Skin scraping       | Sheep   | 75.80 | GTPV | known |
| 184 | NVI CaPV vaccine   | Ethiopia | Cell culture        | Vaccine | 77.40 | LSDV | known |

|     |                  |             |               |        |       |      |       |
|-----|------------------|-------------|---------------|--------|-------|------|-------|
| 185 | CaPV Benshangul  | Ethiopia    | Skin scraping | Goat   | 75.80 | GTPV | known |
| 186 | CaPV Awi C-1     | Ethiopia    | Skin scraping | Sheep  | 75.80 | GTPV | known |
| 187 | CaPV Awi C-2     | Ethiopia    | Skin scraping | Sheep  | 75.80 | GTPV | known |
| 188 | CaPV Awi C-3     | Ethiopia    | Skin scraping | Sheep  | 75.80 | GTPV | known |
| 189 | CaPV Awi C-4     | Ethiopia    | Skin scraping | Sheep  | 75.80 | GTPV | known |
| 190 | CaPV Awi C-5     | Ethiopia    | Skin scraping | Sheep  | 75.80 | GTPV | known |
| 191 | CaPV Awi C-6     | Ethiopia    | Skin scraping | Sheep  | 75.80 | GTPV | known |
| 192 | CaPV FairField   | Ethiopia    | Skin scraping | Cattle | 77.40 | LSDV | known |
| 193 | CaPV Kajima      | Ethiopia    | Skin scraping | Cattle | 77.40 | LSDV | known |
| 194 | CaPV EIAR        | Ethiopia    | Skin scraping | Cattle | 77.40 | LSDV | known |
| 195 | CaPV EDLTI       | Ethiopia    | Skin scraping | Cattle | 77.20 | LSDV | known |
| 196 | CaPV Metekel     | Ethiopia    | Skin scraping | Sheep  | 75.80 | GTPV | known |
| 197 | CaPV NVI         | Ethiopia    | Skin scraping | Goat   | 75.80 | GTPV | known |
| 198 | CaPV Adama C-1   | Ethiopia    | Skin scraping | Cattle | 77.40 | LSDV | known |
| 199 | CaPV Adama C-2   | Ethiopia    | Skin scraping | Cattle | 77.40 | LSDV | known |
| 200 | CaPV Mojo C-1    | Ethiopia    | Skin scraping | Cattle | 77.40 | LSDV | known |
| 201 | CaPV Mojo C-2    | Ethiopia    | Skin scraping | Cattle | 77.40 | LSDV | known |
| 202 | CaPV Wenji C-1   | Ethiopia    | Skin scraping | Cattle | 77.40 | LSDV | known |
| 203 | CaPV Wenji C-2   | Ethiopia    | Skin scraping | Cattle | 77.40 | LSDV | known |
| 204 | CaPV Wenji C-3   | Ethiopia    | Skin scraping | Cattle | 77.40 | LSDV | known |
| 205 | CaPV Andassa C-1 | Ethiopia    | Skin scraping | Cattle | 77.40 | LSDV | known |
| 206 | CaPV Andassa C-2 | Ethiopia    | Skin scraping | Cattle | 77.40 | LSDV | known |
| 207 | CaPV Andassa C-3 | Ethiopia    | Skin scraping | Cattle | 77.40 | LSDV | known |
| 208 | 443/02           | Austria     | Skin scraping | Feline | 71.80 | CPXV | known |
| 209 | 548/07           | Austria     | Skin scraping | Cattle | 72.00 | CPXV | known |
| 210 | 531/92           | Austria     | Skin scraping | Feline | 72.20 | CPXV | known |
| 211 | 2200/12          | Austria     | Skin scraping | Human  | 81.20 | PCPV | known |
| 212 | 1967/09          | Austria     | Skin scraping | Human  | 80.40 | ORFV | known |
| 213 | 72/93            | ATCC VR 302 | Cell culture  | Cattle | 72.20 | CPXV | known |



|     |                    |             |               |         |       |      |       |
|-----|--------------------|-------------|---------------|---------|-------|------|-------|
| 214 | 25/07              | Austria     | Skin scraping | Human   | 80.40 | ORFV | known |
| 215 | 70/10              | Austria     | Skin scraping | Human   | 72.00 | CPXV | known |
| 216 | 73/93              | ATCC VR 156 | Cell culture  | Human   | 72.20 | CPXV | known |
| 217 | 563/10             | Austria     | Skin scraping | Feline  | 71.80 | CPXV | known |
| 218 | PPV 603625         | UK (IAH)    | Skin scraping | Cattle  | 81.20 | PCPV | known |
| 219 | CaPV 2008 C-2      | Senegal     | Skin scraping | Cattle  | 77.40 | LSDV | known |
| 220 | CaPV 2008 C-3      | Senegal     | Skin scraping | Cattle  | 77.40 | LSDV | known |
| 221 | CaPV 2008 C-4      | Senegal     | Skin scraping | Cattle  | 77.20 | LSDV | known |
| 222 | CaPV 2008 C-6      | Senegal     | Skin scraping | Cattle  | 77.40 | LSDV | known |
| 223 | CaPV 2011 C-10     | Senegal     | Skin scraping | Cattle  | 77.40 | LSDV | known |
| 224 | RM 65-Romania      | PANVAC-AU   | Cell culture  | Vaccine | 76.00 | SPPV | known |
| 225 | SPPV Vaccine-Egypt | PANVAC-AU   | Cell culture  | Vaccine | 76.40 | SPPV | known |
| 226 | KS-1-Kenya         | PANVAC-AU   | Cell culture  | Vaccine | 77.40 | LSDV | known |
| 227 | PANVAC C-2         | PANVAC-AU   | Cell culture  | Vaccine | 77.40 | LSDV | known |
| 228 | PANVAC C-3         | PANVAC-AU   | Cell culture  | Vaccine | 77.40 | LSDV | known |
| 229 | PANVAC C-4         | PANVAC-AU   | Cell culture  | Vaccine | 77.40 | LSDV | known |
| 230 | PANVAC C-5         | PANVAC-AU   | Cell culture  | Vaccine | 77.40 | LSDV | known |
| 231 | PANVAC C-6         | PANVAC-AU   | Cell culture  | Vaccine | 76.40 | SPPV | known |
| 232 | PANVAC C-7         | PANVAC-AU   | Cell culture  | Vaccine | 77.40 | LSDV | known |
| 233 | PANVAC C-8         | PANVAC-AU   | Cell culture  | Vaccine | 77.40 | LSDV | known |
| 234 | PANVAC C-9         | PANVAC-AU   | Cell culture  | Vaccine | 77.40 | LSDV | known |
| 235 | PANVAC C-10        | PANVAC-AU   | Cell culture  | Vaccine | 77.40 | LSDV | known |
| 236 | CaPV C-2           | Uganda      | Swab          | Bovine  | 77.20 | LSDV | Blind |
| 237 | CaPV C-3           | Uganda      | Swab          | Bovine  | 77.20 | LSDV | Blind |
| 238 | CaPV C-4           | Uganda      | Swab          | Bovine  | 77.20 | LSDV | Blind |
| 239 | CaPV C-6           | Uganda      | Swab          | Bovine  | 77.40 | LSDV | Blind |
| 240 | CaPV C-7           | Uganda      | Swab          | Bovine  | 77.40 | LSDV | Blind |
| 241 | CaPV C-8           | Uganda      | Swab          | Bovine  | 77.20 | LSDV | Blind |
| 242 | CaPV C-9           | Uganda      | Skin scraping | Bovine  | 77.40 | LSDV | Blind |

|     |                 |          |               |        |       |      |       |
|-----|-----------------|----------|---------------|--------|-------|------|-------|
| 243 | CaPV C-10       | Uganda   | Skin scraping | Bovine | 77.40 | LSDV | Blind |
| 244 | CaPV C-11       | Uganda   | Skin scraping | Bovine | 77.20 | LSDV | Blind |
| 245 | CaPV C-1        | Ethiopia | Skin scraping | Cattle | 77.40 | LSDV | Blind |
| 246 | CaPV C-2        | Ethiopia | Skin scraping | Cattle | 77.20 | LSDV | Blind |
| 247 | CaPV C-3        | Ethiopia | Skin scraping | Cattle | 77.20 | LSDV | Blind |
| 248 | CaPV C-4        | Ethiopia | Skin scraping | Cattle | 77.40 | LSDV | Blind |
| 249 | CaPV C-6        | Ethiopia | Skin scraping | Cattle | 77.40 | LSDV | Blind |
| 250 | CaPV C-7        | Ethiopia | Skin scraping | Cattle | 77.20 | LSDV | Blind |
| 251 | CaPV C-8        | Ethiopia | Skin scraping | Cattle | 77.20 | LSDV | Blind |
| 252 | CaPV C-9        | Ethiopia | Skin scraping | Cattle | 77.40 | LSDV | Blind |
| 253 | CaPV C-10       | Ethiopia | Skin scraping | Cattle | 77.40 | LSDV | Blind |
| 254 | CaPV C-11       | Ethiopia | Skin scraping | Cattle | 77.40 | LSDV | Blind |
| 255 | CaPV C-12       | Ethiopia | Skin scraping | Cattle | 77.20 | LSDV | Blind |
| 256 | CaPV C-13       | Ethiopia | Skin scraping | Goat   | 75.80 | GTPV | Blind |
| 257 | CaPV C-14       | Ethiopia | Skin scraping | Goat   | 75.80 | GTPV | Blind |
| 258 | CaPV C-15       | Ethiopia | Skin scraping | Goat   | 75.80 | GTPV | Blind |
| 259 | CaPV C-17       | Ethiopia | Skin scraping | Goat   | 75.60 | GTPV | Blind |
| 260 | CaPV C-18       | Ethiopia | Skin scraping | Goat   | 75.80 | GTPV | Blind |
| 261 | ORF Msongola    | Tanzania | Scab scraping | Goat   | 80.40 | ORFV | Blind |
| 262 | ORF Kakubiro    | Tanzania | Scab scraping | Goat   | 80.40 | ORFV | Blind |
| 263 | ORF Dondwe1     | Tanzania | Scab scraping | Goat   | 80.40 | ORFV | Blind |
| 264 | ORF Dondwe2     | Tanzania | Scab scraping | Goat   | 80.40 | ORFV | Blind |
| 265 | ORF Mwanzomgumu | Tanzania | Scab scraping | Goat   | 80.40 | ORFV | Blind |
| 266 | ORF Kimanga1    | Tanzania | Scab scraping | Goat   | 80.40 | ORFV | Blind |
| 267 | ORF Kimanga2    | Tanzania | Scab scraping | Goat   | 80.40 | ORFV | Blind |
| 268 | ORF Mapinga1    | Tanzania | Scab scraping | Goat   | 80.40 | ORFV | Blind |
| 269 | ORF Mapinga2    | Tanzania | Scab scraping | Goat   | 80.40 | ORFV | Blind |
| 270 | ORF Kyela2013   | Tanzania | Scab scraping | Goat   | 80.40 | ORFV | Blind |
| 271 | BPSV            | Austria  | Cell culture  | Cattle | 81.60 | BPSV | known |

Supplement table S2. Non-pox virus sample using the HRM assay.

| <b>SI No.</b> | <b>Strain name</b> | <b>Country of origin</b> | <b>Sample type</b>   | <b>Host</b> | <b>Tm</b>        | <b>Genotype</b> |
|---------------|--------------------|--------------------------|----------------------|-------------|------------------|-----------------|
| 1             | PPRV Nigeria 75/1  | Ethiopia                 | Vaccine              | N/A         | No amplification | None            |
| 2             | cDNA PPRV          | Ethiopia                 | Pathological lesions | Goat        | No amplification | None            |
| 3             | cDNA PPRV          | Ethiopia                 | Pathological lesions | Goat        | No amplification | None            |
| 4             | cDNA PPRV          | Ethiopia                 | Pathological lesions | Goat        | No amplification | None            |
| 5             | cDNA FMDV          | Ethiopia                 | Vaccine              | N/A         | No amplification | None            |
| 6             | cDNA FMDV          | Ethiopia                 | Lesion scraping      | Cattle      | No amplification | None            |
| 7             | cDNA FMDV          | Ethiopia                 | Lesion scraping      | Cattle      | No amplification | None            |
| 8             | cDNA FMDV          | Ethiopia                 | Lesion scraping      | Cattle      | No amplification | None            |
| 9             | cDNA FMDV          | Ethiopia                 | Lesion scraping      | Cattle      | No amplification | None            |
| 10            | DNA CCPP           | Ethiopia                 | Vaccine              | N/A         | No amplification | None            |
| 11            | DNA CCPP           | Ethiopia                 | Pathological lesions | Goat        | No amplification | None            |
| 12            | DNA CCPP           | Ethiopia                 | Pathological lesions | Goat        | No amplification | None            |
| 13            | DNA CCPP           | Ethiopia                 | Pathological lesions | Goat        | No amplification | None            |
| 14            | DNA CCPP           | Ethiopia                 | Pathological lesions | Goat        | No amplification | None            |
